# Supplementary material for: Validation of a modified VOICES survey to measure end-of-life care quality: the CaregiverVoice survey
Source: BMC Palliat Care. 2017 Aug 30;16:44. doi: 10.1186/s12904-017-0227-7 (PMC5577821; doi:10.1186/s12904-017-0227-7)
Supplement: Additional file 1: — CaregiverVoice survey. (PDF 386 kb) [file 12904_2017_227_MOESM1_ESM.pdf]

## CaregiverVoice Survey

This survey is about the experiences of care and the services received by you and your family member/friend in the last months of his/her life. The information you give will help us improve care for people who are dying, and for their family and friends. Your views are, therefore, important to us. We realize this questionnaire may bring back strong memories.

Some of the questions may not be relevant to you. Please fill in as much of the survey as you can, or if you would rather not answer one of the questions, please go on to the next one.

**Instructions:** As you go through the survey, please follow the instructions and answer the questions by ticking the most appropriate box or boxes, like this ☒. Tick only one answer to each question unless the question states otherwise.

The survey takes about 20 minutes to complete.

**Please complete the survey at your earliest convenience and return the completed survey in the stamped, self-addressed envelope provided.**

## **PART A: Family Member/Friend Information**

**The first set of questions asks some general information about the family member/friend you cared for.**

1. What was the gender of this person?

☐ Male

☐ Female

☐ Transgender/Other

2. How old was he/she when he/she died?

☐ 0-17

☐ 50-69

☐ 90+

☐ 18-29

☐ 70-89

☐ Don't know

☐ 30-49

3. How long ago did he/she die?

☐ Less than 2 months ago

☐ 6 months to 1 year ago

☐ 2 to 4 months ago

☐ Longer than 1 year ago

☐ 4 to 6 months ago

4. What was his/her **main** illness in the **last 3 months** of life? *Tick one only*

☐ Cancer

☐ Influenza or Pneumonia

☐ Heart Disease, e.g., congestive heart failure

☐ Neurological Disease, e.g., Alzheimer's, ALS

☐ Stroke

☐ Kidney or Liver Disease

☐ Lung Disease, e.g., COPD, asthma

☐ Other

☐ Diabetes

☐ Don't know

5. Did he/she identify him/herself as Aboriginal? (e.g., North American Indian, First Nations, Métis, or Inuit)

☐ Yes

☐ No – go to Q6

☐ Don't know – go to Q6

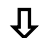

If YES, which were they? *Tick one only*

☐ First Nation (status)

☐ Métis

☐ Don't know

☐ First Nation (non-status)

☐ Inuk

☐ Other, please specify: \_\_\_\_\_

Was his/her permanent address on a First Nations territory or reserve?

☐ Yes

☐ No

6. What was his/her religion? *Tick one only*

- |                                                        |                                 |                                     |
|--------------------------------------------------------|---------------------------------|-------------------------------------|
| <input type="checkbox"/> No religion                   | <input type="checkbox"/> Hindu  | <input type="checkbox"/> Sikh       |
| <input type="checkbox"/> Christian (all denominations) | <input type="checkbox"/> Jewish | <input type="checkbox"/> Other      |
| <input type="checkbox"/> Buddhist                      | <input type="checkbox"/> Muslim | <input type="checkbox"/> Don't Know |

**The next set of questions asks some general information about you.**

7. What was your relationship to him/her? You were the: *Tick one only*

- |                                            |                                                       |
|--------------------------------------------|-------------------------------------------------------|
| <input type="checkbox"/> Married spouse    | <input type="checkbox"/> Brother-in-law/sister-in-law |
| <input type="checkbox"/> Common law spouse | <input type="checkbox"/> Parent/parent-in-law         |
| <input type="checkbox"/> Son/daughter      | <input type="checkbox"/> Son/daughter-in-law          |
| <input type="checkbox"/> Brother/sister    | <input type="checkbox"/> Other                        |

8. What is your gender?

- |                               |                                 |                                            |
|-------------------------------|---------------------------------|--------------------------------------------|
| <input type="checkbox"/> Male | <input type="checkbox"/> Female | <input type="checkbox"/> Transgender/Other |
|-------------------------------|---------------------------------|--------------------------------------------|

9. How old are you?

- |                                |                                |                                |                                |                              |
|--------------------------------|--------------------------------|--------------------------------|--------------------------------|------------------------------|
| <input type="checkbox"/> 16-29 | <input type="checkbox"/> 30-49 | <input type="checkbox"/> 50-69 | <input type="checkbox"/> 70-89 | <input type="checkbox"/> 90+ |
|--------------------------------|--------------------------------|--------------------------------|--------------------------------|------------------------------|

## **PART B: Care in Different Settings**

**The questions in the next sections are about care your family member/friend may have received in different settings, as specified.**

### **Homecare**

10. Did he/she have care from **homecare providers** (nurses, personal support workers, social workers, etc.) contracted by the Community Care Access Centre (CCAC) in the **last 3 months** of life?

- ☐ Yes
- ☐ No – **go to Q15**

11. When he/she was at home in the **last 3 months** of life, did the **homecare providers** work well together?

☐ Yes, definitely

☐ No, they did not work well together

☐ Yes, to some extent

☐ Don't know

12. Overall, do you feel that you and your family got as much help and support from **homecare services** as you needed?

☐ Yes, we got as much support as we needed

☐ No, we did not get as much support as we needed, but we did not ask for more

☐ No, we did not get as much support as we needed though we tried to get more

13. During the **last 3 months** of his/her life, while he/she was receiving **homecare services**, what is your assessment of the **overall** level of support given in the following areas?

|                                                   | Excellent                | Very Good                | Good                     | Fair                     | Poor                     | Does not Apply           | Don't Know               |
|---------------------------------------------------|--------------------------|--------------------------|--------------------------|--------------------------|--------------------------|--------------------------|--------------------------|
| Relief of physical pain                           | <input type="checkbox"/> |
| Relief of other symptoms                          | <input type="checkbox"/> |
| Spiritual support                                 | <input type="checkbox"/> |
| Emotional support                                 | <input type="checkbox"/> |
| Practical support with activities of daily living | <input type="checkbox"/> |
| Respect and dignity                               | <input type="checkbox"/> |

14. Overall, do you feel that the care he/she got from the nurses, personal support workers (PSW's), and CCAC care coordinators in the **last 3 months** of life was: *Answer individually for each*

|                                  | Excellent                | Very Good                | Good                     | Fair                     | Poor                     | Does not Apply           | Don't Know               |
|----------------------------------|--------------------------|--------------------------|--------------------------|--------------------------|--------------------------|--------------------------|--------------------------|
| Nurses                           | <input type="checkbox"/> |
| Personal Support Workers (PSW's) | <input type="checkbox"/> |
| CCAC Care Coordinators           | <input type="checkbox"/> |

**Care from a Clinician (i.e., Family Doctor, Other Doctor, or Nurse Practitioner)**

15. In the **last 3 months** of his/her life, which type of clinician provided the **most** of his/her care? *Tick one only*

- |                                                 |                                                                                          |
|-------------------------------------------------|------------------------------------------------------------------------------------------|
| <input type="checkbox"/> His/her family doctor  | <input type="checkbox"/> Oncologist – <b>go to Q17</b>                                   |
| <input type="checkbox"/> Palliative care doctor | <input type="checkbox"/> Other doctor/specialist (e.g., cardiologist) – <b>go to Q17</b> |
| <input type="checkbox"/> Nurse practitioner     | <input type="checkbox"/> He/she never saw a clinician – <b>go to Q19</b>                 |
|                                                 | <input type="checkbox"/> Don't know – <b>go to Q19</b>                                   |

16. Did the **clinician you selected above** visit him/her **at home** in the **last 3 months** of life?

- |                              |                             |                                     |
|------------------------------|-----------------------------|-------------------------------------|
| <input type="checkbox"/> Yes | <input type="checkbox"/> No | <input type="checkbox"/> Don't know |
|------------------------------|-----------------------------|-------------------------------------|

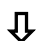

**If Yes**, how easy or difficult it was to get this home visit? *Tick one only*

- ☐ Very easy  
☐ Fairly easy  
☐ Fairly difficult  
☐ Very difficult  
☐ Don't know

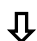

**If No**, why not? *Tick one only*

- ☐ He/she **did not need** a home visit by a clinician  
☐ He/she **needed** a home visit by a clinician but could not get a visit  
☐ Don't know

17. During the **last 3 months** of his/her life, while he/she was being cared for by the **clinician you selected above** (Question 15), what is your assessment of the **overall** level of support given in the following areas?

|                          | Excellent                | Very Good                | Good                     | Fair                     | Poor                     | Does not Apply           | Don't Know               |
|--------------------------|--------------------------|--------------------------|--------------------------|--------------------------|--------------------------|--------------------------|--------------------------|
| Relief of physical pain  | <input type="checkbox"/> |
| Relief of other symptoms | <input type="checkbox"/> |
| Spiritual support        | <input type="checkbox"/> |
| Emotional support        | <input type="checkbox"/> |
| Respect and dignity      | <input type="checkbox"/> |

18. Overall, do you feel that the care he/she got from this **clinician** in the **last 3 months** of life was:

- |                          |                          |                          |                          |                          |                          |
|--------------------------|--------------------------|--------------------------|--------------------------|--------------------------|--------------------------|
| <input type="checkbox"/> |
| Excellent                | Very Good                | Good                     | Fair                     | Poor                     | Don't know               |

### **Urgent Care Provided Out of Normal Business Hours**

19. In the **last 3 months** of life, while he/she was at **home**, how often did he/she ever need to contact a health professional for something **urgent** in the evening or during the weekend?

- |                                                                             |                                                            |
|-----------------------------------------------------------------------------|------------------------------------------------------------|
| <input type="checkbox"/> Not at all in the last 3 months – <b>go to Q22</b> | <input type="checkbox"/> Five times or more                |
| <input type="checkbox"/> Once or twice                                      | <input type="checkbox"/> Not applicable – <b>go to Q22</b> |
| <input type="checkbox"/> Three or four times                                | <input type="checkbox"/> Don't know – <b>go to Q22</b>     |

20. The **last time this happened**, who did he/she contact, or who was contacted on his/her behalf? *Tick one only*

- |                                                                                   |                                                                |
|-----------------------------------------------------------------------------------|----------------------------------------------------------------|
| <input type="checkbox"/> His/her family doctor or the doctor's after-hours number | <input type="checkbox"/> Both a doctor and a homecare provider |
| <input type="checkbox"/> His/her palliative care doctor                           | <input type="checkbox"/> Hospice                               |
| <input type="checkbox"/> Homecare provider                                        | <input type="checkbox"/> 911 or used lifeline pendant          |
| <input type="checkbox"/> Nurse practitioner                                       | <input type="checkbox"/> Other                                 |

21. What happened as a result? *Tick one only*

- |                                                                                        |                                                                                 |
|----------------------------------------------------------------------------------------|---------------------------------------------------------------------------------|
| <input type="checkbox"/> Visited by his/her family doctor at home                      | <input type="checkbox"/> Given medical advice over the telephone                |
| <input type="checkbox"/> Visited by a palliative care doctor or another doctor at home | <input type="checkbox"/> Given another number to call to get medical advice     |
| <input type="checkbox"/> Visited by a homecare provider at home                        | <input type="checkbox"/> Advised to call 911                                    |
| <input type="checkbox"/> Visited by both a doctor and a homecare provider              | <input type="checkbox"/> Advised to go to an Emergency Department at a hospital |
| <input type="checkbox"/> Visited by a nurse practitioner at home                       | <input type="checkbox"/> Other                                                  |

### **Visiting Hospice Volunteers**

22. Did he/she get help from **visiting hospice volunteer(s)** in the home in the **last 3 months** of life?

- ☐ Yes
- ☐ No – **go to Q24**
- ☐ Don't know – **go to Q24**

23. Indicate your opinion about the help he/she got from the **visiting hospice volunteer(s)** in the **last 3 months** of life as to the following:

|                                                                          | Strongly Agree           | Agree                    | Neither                  | Disagree                 | Strongly Disagree        | Does not Apply           | Don't Know               |
|--------------------------------------------------------------------------|--------------------------|--------------------------|--------------------------|--------------------------|--------------------------|--------------------------|--------------------------|
| a) Helped to improve his/her wellbeing                                   | <input type="checkbox"/> |
| b) Allowed me to take time for myself, which contributed to my wellbeing | <input type="checkbox"/> |

### **Cancer Centre**

24. Did he/she receive care at a **cancer centre** during his/her **last 3 months** of life?

☐ Yes, please name the cancer centre he/she spent the most time in: \_\_\_\_\_

☐ No – **go to Q27**

☐ Don't know – **go to Q27**

25. During the **last 3 months** of his/her life, when he/she was being cared for by the **cancer centre** you named, what is your assessment of the **overall** level of support given in the following areas?

|                          | Excellent                | Very Good                | Good                     | Fair                     | Poor                     | Does not Apply           | Don't Know               |
|--------------------------|--------------------------|--------------------------|--------------------------|--------------------------|--------------------------|--------------------------|--------------------------|
| Relief of physical pain  | <input type="checkbox"/> |
| Relief of other symptoms | <input type="checkbox"/> |
| Spiritual support        | <input type="checkbox"/> |
| Emotional support        | <input type="checkbox"/> |
| Respect and dignity      | <input type="checkbox"/> |

26. Overall, do you feel that the care he/she got from the **cancer centre** you named, in the **last 3 months** of life was:

☐ Excellent     
 ☐ Very Good     
 ☐ Good     
 ☐ Fair     
 ☐ Poor     
 ☐ Don't know

### **Long Term Care Homes**

27. Did he/she live or stay in a **Long Term Care home** at any time during his/her **last 3 months** of life?

- ☐ Yes, please name: \_\_\_\_\_
- ☐ No – go to Q30
- ☐ Don't know – go to Q30

28. During the **last 3 months** of his/her life, while he/she was in a **Long Term Care home**, what is your assessment of the **overall** level of support given in the following areas?

|                          | Excellent                | Very Good                | Good                     | Fair                     | Poor                     | Does not Apply           | Don't Know               |
|--------------------------|--------------------------|--------------------------|--------------------------|--------------------------|--------------------------|--------------------------|--------------------------|
| Relief of physical pain  | <input type="checkbox"/> |
| Relief of other symptoms | <input type="checkbox"/> |
| Spiritual support        | <input type="checkbox"/> |
| Emotional support        | <input type="checkbox"/> |
| Respect and dignity      | <input type="checkbox"/> |

29. Overall, do you feel that the care he/she got from the **Long Term Care home** in the **last 3 months** of life was:

- |                          |                          |                          |                          |                          |                          |
|--------------------------|--------------------------|--------------------------|--------------------------|--------------------------|--------------------------|
| <input type="checkbox"/> |
| Excellent                | Very Good                | Good                     | Fair                     | Poor                     | Don't know               |

### **Last Hospital Admission**

30. How often in the **last 3 months** of life did he/she have to go to the **Emergency Department (ED)**?

- |                                                 |                                                 |
|-------------------------------------------------|-------------------------------------------------|
| <input type="checkbox"/> Not at all – go to Q32 | <input type="checkbox"/> Five times or more     |
| <input type="checkbox"/> Once or twice          | <input type="checkbox"/> Don't know – go to Q32 |
| <input type="checkbox"/> Three or four times    |                                                 |

31. What was the **main** reason for his/her **last Emergency Department (ED)** visit? *Tick one only*

- |                                                                                      |                                                                     |
|--------------------------------------------------------------------------------------|---------------------------------------------------------------------|
| <input type="checkbox"/> Altered consciousness or fatigue                            | <input type="checkbox"/> Caregiver respite/unable to manage at home |
| <input type="checkbox"/> Pain issues                                                 | <input type="checkbox"/> Multiple issues                            |
| <input type="checkbox"/> Other symptom issues (e.g.,<br>nausea, shortness of breath) | <input type="checkbox"/> Other reason                               |
| <input type="checkbox"/> Infection                                                   | <input type="checkbox"/> Don't know                                 |

32. How many days **total** did he/she stay in **hospital**, including a palliative care unit, during his/her **last 3 months** of life?

- |                                                  |                                                 |
|--------------------------------------------------|-------------------------------------------------|
| <input type="checkbox"/> None at all – go to Q36 | <input type="checkbox"/> 2 weeks to 4 weeks     |
| <input type="checkbox"/> Less than 7 days        | <input type="checkbox"/> more than 4 weeks      |
| <input type="checkbox"/> 7 to 13 days            | <input type="checkbox"/> Don't know – go to Q36 |

33. What was the **main** reason for his/her **last hospital admission**: *Tick one only*

- |                                                                                           |                                                                     |
|-------------------------------------------------------------------------------------------|---------------------------------------------------------------------|
| <input type="checkbox"/> Treatment of disease (e.g., chemo,<br>surgery, tests, follow up) | <input type="checkbox"/> Infection                                  |
| <input type="checkbox"/> Pain issues                                                      | <input type="checkbox"/> Caregiver respite/unable to manage at home |
| <input type="checkbox"/> Other symptom issues (e.g.,<br>nausea, shortness of breath)      | <input type="checkbox"/> Multiple issues                            |
|                                                                                           | <input type="checkbox"/> Other reason                               |
|                                                                                           | <input type="checkbox"/> Don't know                                 |

Name of **hospital**: \_\_\_\_\_

34. During his/her **last hospital admission**, what is your assessment of the **overall** level of support given in the following areas?

|                          | Excellent                | Very Good                | Good                     | Fair                     | Poor                     | Does not Apply           | Don't Know               |
|--------------------------|--------------------------|--------------------------|--------------------------|--------------------------|--------------------------|--------------------------|--------------------------|
| Relief of physical pain  | <input type="checkbox"/> |
| Relief of other symptoms | <input type="checkbox"/> |
| Spiritual support        | <input type="checkbox"/> |
| Emotional support        | <input type="checkbox"/> |
| Respect and dignity      | <input type="checkbox"/> |

35. Overall, do you feel that the care he/she got from the **hospital** on that admission was:

- |                          |                          |                          |                          |                          |                          |
|--------------------------|--------------------------|--------------------------|--------------------------|--------------------------|--------------------------|
| <input type="checkbox"/> |
| Excellent                | Very Good                | Good                     | Fair                     | Poor                     | Don't Know               |

### **Residential Hospice Admission**

36. Did he/she stay in a **hospice** at any time during his/her **last 3 months** of life?

☐ Yes, please name: \_\_\_\_\_

☐ No – **go to Q39**

☐ Don't know – **go to Q39**

37. During the **last 3 months** of his/her life, while he/she was in **hospice**, what is your assessment of the **overall** level of support given in the following areas?

|                          | Excellent                | Very Good                | Good                     | Fair                     | Poor                     | Does not Apply           | Don't Know               |
|--------------------------|--------------------------|--------------------------|--------------------------|--------------------------|--------------------------|--------------------------|--------------------------|
| Relief of physical pain  | <input type="checkbox"/> |
| Relief of other symptoms | <input type="checkbox"/> |
| Spiritual support        | <input type="checkbox"/> |
| Emotional support        | <input type="checkbox"/> |
| Respect and dignity      | <input type="checkbox"/> |

38. Overall, do you feel that the care he/she got from the **hospice** was:

☐      ☐      ☐      ☐      ☐      ☐  
Excellent    Very Good    Good    Fair    Poor    Don't Know

### **PART C: Overall Care**

39. Overall, and taking all services, in all settings into account, how would you rate his/her care in the **last 3 months** of life?

☐      ☐      ☐      ☐      ☐      ☐  
Excellent    Very Good    Good    Fair    Poor    Don't Know

## **PART D: Experiences in the Last Week of Life**

40. Where did your family member/friend receive most of their care in the **last week of life**: (if equal time was spent in 2 or more settings, select the one most used towards the end of their life) *Tick one only*

- |                                                                |                                                                           |
|----------------------------------------------------------------|---------------------------------------------------------------------------|
| <input type="checkbox"/> Home <u>with</u> Homecare services    | <input type="checkbox"/> Hospital acute or intensive care                 |
| <input type="checkbox"/> Home <u>without</u> Homecare services | <input type="checkbox"/> Hospital complex continuing care unit (CCC Unit) |
| <input type="checkbox"/> Long term care home                   | <input type="checkbox"/> Hospital palliative care unit (PCU)              |
| <input type="checkbox"/> Retirement home                       | <input type="checkbox"/> Other                                            |
| <input type="checkbox"/> Residential hospice                   |                                                                           |

41. Thinking about the **setting you selected above** (Question 40), indicate your opinion about the help he/she received in the **last week of life** to each of the following:

|                                                                                                                           | Strongly Agree           | Agree                    | Neither                  | Disagree                 | Strongly Disagree        | Does not Apply           | Don't Know               |
|---------------------------------------------------------------------------------------------------------------------------|--------------------------|--------------------------|--------------------------|--------------------------|--------------------------|--------------------------|--------------------------|
| a) There was enough help available to meet his/her personal care needs (such as toileting needs)                          | <input type="checkbox"/> |
| b) There was enough help with nursing care, such as giving medicine or helping him/her find a comfortable position in bed | <input type="checkbox"/> |
| c) The bed area and surrounding environment had adequate privacy for him/her                                              | <input type="checkbox"/> |
| d) There was enough support to stay where he/she wanted to be                                                             | <input type="checkbox"/> |

42. During the **last week of life for the setting you specified** (Question 40) what is your assessment of the level of support given in the following areas?

|                          | Excellent                | Very Good                | Good                     | Fair                     | Poor                     | Does not Apply           | Don't Know               |
|--------------------------|--------------------------|--------------------------|--------------------------|--------------------------|--------------------------|--------------------------|--------------------------|
| Relief of physical pain  | <input type="checkbox"/> |
| Relief of other symptoms | <input type="checkbox"/> |
| Spiritual support        | <input type="checkbox"/> |
| Emotional support        | <input type="checkbox"/> |
| Respect and dignity      | <input type="checkbox"/> |

### **PART E: Transitions**

43. To what extent did he/she experience **smooth transitions** between all settings of care during the **last 3 months** of life?

- |                                                    |                                                        |
|----------------------------------------------------|--------------------------------------------------------|
| <input type="checkbox"/> Always – <b>go to Q46</b> | <input type="checkbox"/> Rarely                        |
| <input type="checkbox"/> Most of the time          | <input type="checkbox"/> Never                         |
| <input type="checkbox"/> Sometimes                 | <input type="checkbox"/> Don't know – <b>go to Q46</b> |

44. Identify the **worst** transition he/she experienced by checking the two settings where this transition began and finished. Only record the **worst** transition experienced.

| Setting he/she started in:                                          | Setting he/she transitioned to:                                     |
|---------------------------------------------------------------------|---------------------------------------------------------------------|
| <input type="checkbox"/> Home <u>with</u> Homecare services         | <input type="checkbox"/> Home <u>with</u> Homecare services         |
| <input type="checkbox"/> Home <u>without</u> Homecare services      | <input type="checkbox"/> Home <u>without</u> Homecare services      |
| <input type="checkbox"/> Hospital bed                               | <input type="checkbox"/> Hospital bed                               |
| <input type="checkbox"/> Emergency department or Urgent care clinic | <input type="checkbox"/> Emergency department or Urgent care clinic |
| <input type="checkbox"/> Long term care home                        | <input type="checkbox"/> Long term care home                        |
| <input type="checkbox"/> Retirement home                            | <input type="checkbox"/> Retirement home                            |
| <input type="checkbox"/> Hospice                                    | <input type="checkbox"/> Hospice                                    |

45. What made this transition so poor?

---



---



---

## **PART F: Circumstances Surrounding His/Her Death**

46. Did he/she know he/she was likely to die?

- |                                         |                                             |
|-----------------------------------------|---------------------------------------------|
| <input type="checkbox"/> Yes, certainly | <input type="checkbox"/> No, definitely not |
| <input type="checkbox"/> Yes, probably  | <input type="checkbox"/> Not sure           |
| <input type="checkbox"/> Probably not   |                                             |

47. How long had he/she been ill before he/she died? *Tick one only*

- |                                                                    |                                                                      |
|--------------------------------------------------------------------|----------------------------------------------------------------------|
| <input type="checkbox"/> He/she was not ill – he/she died suddenly | <input type="checkbox"/> One month or more, but less than six months |
| <input type="checkbox"/> Less than 24 hours                        | <input type="checkbox"/> Six months or more, but less than one year  |
| <input type="checkbox"/> One day or more, but less than one week   | <input type="checkbox"/> One year or more                            |
| <input type="checkbox"/> One week or more, but less than one month |                                                                      |

48. Where did he/she die? *Tick one only*

- |                                                   |                                                                                             |
|---------------------------------------------------|---------------------------------------------------------------------------------------------|
| <input type="checkbox"/> At home                  | <input type="checkbox"/> In a hospital acute or intensive care unit or emergency department |
| <input type="checkbox"/> In a hospice             | <input type="checkbox"/> In a hospital palliative care unit (PCU)                           |
| <input type="checkbox"/> In a long term care home | <input type="checkbox"/> In a hospital complex continuing care unit (CCCU)                  |
| <input type="checkbox"/> In a retirement home     | <input type="checkbox"/> Other                                                              |

49. Did he/she ever say where he/she would like to die?

- ☐ Yes
- ☐ No – **go to Q52**
- ☐ Not sure – **go to Q52**

50. What was his/her **last known** preferred place to die? *Tick one only*

- |                                                   |                                                                                 |
|---------------------------------------------------|---------------------------------------------------------------------------------|
| <input type="checkbox"/> At home                  | <input type="checkbox"/> He/she said that he/she did not mind where he/she died |
| <input type="checkbox"/> In a hospice             |                                                                                 |
| <input type="checkbox"/> In a hospital            | <input type="checkbox"/> Anywhere except at home                                |
| <input type="checkbox"/> In a long term care home | <input type="checkbox"/> Anywhere except in hospital                            |
| <input type="checkbox"/> In a retirement home     | <input type="checkbox"/> Don't know – go to Q52                                 |

51. Did the health care providers have a record of this preference of where he/she wanted to die?
- ☐ Yes
  - ☐ No
  - ☐ Not sure
52. Do you think that he/she died in the right place?
- ☐ Yes
  - ☐ No
  - ☐ Not sure
53. Were you or his/her family given enough help and support by the health care providers at the actual time of his/her death?
- ☐ Yes, definitely
  - ☐ No, not at all
  - ☐ Yes, to some extent
  - ☐ Don't know
54. Looking back over the **last 3 months** of his/her life, was he/she involved in decisions about his/her care as much as he/she would have wanted? *Tick one only*
- ☐ He/she was involved as much as he/she wanted to be
  - ☐ He/she wasn't able to be involved due to incapacity
  - ☐ He/she would have liked to be more involved
  - ☐ Don't know
  - ☐ He/she would have liked to be less involved
55. Looking back over the **last 3 months** of his/her life, were you involved in decisions about his/her care as much as you would have wanted?
- ☐ I was involved as much as I wanted to be
  - ☐ I would have liked to be more involved
  - ☐ I would have liked to be less involved
  - ☐ Don't know
56. Were any decisions made about his/her care that he/she would not have wanted?
- ☐ No
  - ☐ Yes, please specify: \_\_\_\_\_
  - ☐ Don't know

57. Since he/she died, have you talked to anyone from health and supportive services, or from a bereavement service, about your feelings about his/her illness and death?

- ☐ Yes
- ☐ No, I was not aware of these services but I would have liked to use them
- ☐ No, I was not aware of these services but I was not interested anyway
- ☐ No, I was aware of these services but I was not interested anyway
- ☐ Not sure

### **PART G: Advance Care Planning**

**The following questions pertain to discussions surrounding Advance Care Planning, which is defined as planning for care in case your family member/friend is not able to make decisions about him/herself in the future.**

58. Was he/she given the opportunity to discuss **advance care planning** with his/her health care providers?

- ☐ Yes, definitely
- ☐ Yes, to some extent
- ☐ No, he/she was not given the opportunity – **go to Q61**
- ☐ Don't know – **go to Q61**

59. Who was the **main** provider who discussed **advance care planning** with him/her? *Tick one only*

- |                                                                       |                                                                  |
|-----------------------------------------------------------------------|------------------------------------------------------------------|
| <input type="checkbox"/> His/her family doctor                        | <input type="checkbox"/> Homecare nurse (not nurse practitioner) |
| <input type="checkbox"/> Palliative care doctor                       | <input type="checkbox"/> Hospital nurse                          |
| <input type="checkbox"/> Nurse practitioner                           | <input type="checkbox"/> Hospice nurse                           |
| <input type="checkbox"/> Oncologist                                   | <input type="checkbox"/> Other, please specify: _____            |
| <input type="checkbox"/> Other doctor/specialist (e.g., cardiologist) | <input type="checkbox"/> Don't know                              |

60. Did this discussion come:

- |                                    |                                            |
|------------------------------------|--------------------------------------------|
| <input type="checkbox"/> Too early | <input type="checkbox"/> At the right time |
| <input type="checkbox"/> Too late  | <input type="checkbox"/> Don't know        |

61. Did your healthcare providers help you, the caregiver, understand what to expect/how to prepare for his/her death?

- |                                              |                                     |
|----------------------------------------------|-------------------------------------|
| <input type="checkbox"/> Yes, definitely     | <input type="checkbox"/> No         |
| <input type="checkbox"/> Yes, to some extent | <input type="checkbox"/> Don't know |

## **PART H: Final Thoughts You Wish to Share**

62. Lastly, please share any other thoughts you have about what was **good** and what was **bad** about the care services that were provided to your family member or friend within the **last 3 months** of life.

**What, if anything, was good about the care?**

---

---

---

---

---

---

**What, if anything, was bad about the care?**

---

---

---

---

---

---

*Choosing to name a provider can have an effect on your anonymity. All efforts will be made to maintain the highest level of anonymity and information security.*

**Thank you!**

**The time you spent completing this survey is greatly appreciated**

**Please return completed survey in the stamped, self-addressed envelope provided As Soon As Possible.**
